# Supplementary material
Source: Springer Nature journal article supplement (https://www.springermedizin.de/resource/supplementary/12885_2009_1976_MOESM9_ESM.pdf/9460224)
Supplement: MOESM9 [file 9460224]

**Table 1**

| Treatment                                              | Time intervall after cell injection [min] |                 |                 |                 |
|--------------------------------------------------------|-------------------------------------------|-----------------|-----------------|-----------------|
|                                                        | 0 - 10                                    | 11 - 20         | 21 - 30         | 31 - 40         |
| adherent cells / 20 microscopic fields [mean $\pm$ SD] |                                           |                 |                 |                 |
| <b>T 84</b>                                            |                                           |                 |                 |                 |
| control IgG [n=6]                                      | 16.7 $\pm$ 9.0                            | 15.8 $\pm$ 5.1  | 14.1 $\pm$ 5.6  | 13.0 $\pm$ 1.9  |
| <b>HT-29 LMM</b>                                       |                                           |                 |                 |                 |
| control IgG [n=9]                                      | 13.5 $\pm$ 5.1                            | 13.5 $\pm$ 4.8  | 11.1 $\pm$ 2.7  | 13.5 $\pm$ 2.3  |
| anti integrin- $\beta$ 1 [n=7]                         | 11.4 $\pm$ 4.7                            | 11.8 $\pm$ 4.4  | 12.9 $\pm$ 2.7  | 12.3 $\pm$ 3.8  |
| anti integrin- $\beta$ 4 [n=10]                        | 13.4 $\pm$ 7.6                            | 10.7 $\pm$ 4.0  | 10.4 $\pm$ 3.2  | 11.0 $\pm$ 4.5  |
| anti integrin- $\alpha$ v [n=8]                        | 10.6 $\pm$ 5.1                            | 10.1 $\pm$ 4.1  | 9.5 $\pm$ 2.5   | 11.7 $\pm$ 2.7  |
| vehicle [n=12]                                         | 12.8 $\pm$ 4.7                            | 13.2 $\pm$ 6.7  | 10.9 $\pm$ 3.9  | 15.0 $\pm$ 5.9  |
| neuraminidase type V [n=8]                             | 7.4 $\pm$ 3.0                             | 6.6 $\pm$ 2.3*  | 6.5 $\pm$ 2.6*  | 7.9 $\pm$ 2.9** |
| fucoidane (animals) [n=7]                              | 11.6 $\pm$ 6.9                            | 7.4 $\pm$ 3.1*  | 7.2 $\pm$ 3.3*  | 5.6 $\pm$ 2.5** |
| control medium [n=5]                                   | 10.9 $\pm$ 5.1                            | 18.3 $\pm$ 10.1 | 16.4 $\pm$ 3.9  | 14.8 $\pm$ 6.1  |
| anti galectin-3 [n=5]                                  | 18.8 $\pm$ 6.7                            | 13.3 $\pm$ 2.4  | 13.1 $\pm$ 2.9  | 12.3 $\pm$ 3.2  |
| anti TF [n=4]                                          | 11.5 $\pm$ 14.7                           | 7.9 $\pm$ 4.7*  | 8.6 $\pm$ 3.7** | 7.2 $\pm$ 4.0*  |
| anti TF + anti galectin-3 [n=5]                        | 11.6 $\pm$ 1.0                            | 7.4 $\pm$ 2.8** | 7.3 $\pm$ 2.3** | 6.5 $\pm$ 1.4** |

ANOVA and post hoc (LSD):

\* p&lt;0.05

\*\* p&lt;0.001
